# Supplementary material
Source: Research Square preprint supplement (doi:10.21203/rs.3.rs-9359064/v1)
Supplement: Supplementary file 1 [file b74192b55083a9ab24aa7f4b.pdf]

## Supplementary materials

| Model name            | SSP5-8.5   | SSP3-7.0   | SSP2-4.5   |
|-----------------------|------------|------------|------------|
| ACCESS-CM2            | 3          | 3          | 3          |
| ACCESS-ESM1-5         | 10         | 10         | 30         |
| AWI-CM-1-1-MR         | 1          | 5          | 1          |
| BCC-CSM2-MR           | 1          | 1          | 1          |
| CAS-ESM2-0            | 1          | 1          | 1          |
| CESM2                 | 4          | 100        | 3          |
| CESM2-WACCM           | 3          | 3          | 3          |
| CIESM                 | 0          | 0          | 1          |
| CMCC-CM2-SR5          | 1          | 1          | 1          |
| CMCC-ESM2             | 1          | 1          | 1          |
| CanESM5               | 50         | 50         | 50         |
| CanESM5-CanOE         | 3          | 3          | 3          |
| E3SM-1-1              | 1          | 0          | 0          |
| EC-Earth3             | 52         | 52         | 64         |
| EC-Earth3-<br>AerChem | 0          | 2          | 0          |
| EC-Earth3-CC          | 1          | 0          | 1          |
| EC-Earth3-Veg         | 5          | 3          | 5          |
| EC-Earth3-Veg-LR      | 3          | 3          | 3          |
| FGOALS-f3-L           | 1          | 1          | 1          |
| FIO-ESM-2-0           | 3          | 0          | 3          |
| GFDL-CM4              | 1          | 0          | 1          |
| GFDL-ESM4             | 1          | 1          | 3          |
| GISS-E2-1-G           | 7          | 15         | 19         |
| GISS-E2-1-H           | 0          | 0          | 5          |
| HadGEM3-GC31-<br>LL   | 0          | 0          | 1          |
| INM-CM4-8             | 1          | 1          | 1          |
| INM-CM5-0             | 1          | 5          | 1          |
| IPSL-CM5A2-INCA       | 0          | 1          | 0          |
| IPSL-CM6A-LR          | 7          | 11         | 11         |
| KACE-1-0-G            | 3          | 3          | 3          |
| MIROC-ES2L            | 1          | 5          | 24         |
| MIROC6                | 50         | 3          | 22         |
| MPI-ESM1-2-LR         | 10         | 10         | 10         |
| MRI-ESM2-0            | 2          | 5          | 4          |
| NESM3                 | 0          | 0          | 2          |
| NorESM2-LM            | 1          | 1          | 2          |
| NorESM2-MM            | 1          | 1          | 1          |
| TaiESM1               | 1          | 1          | 1          |
| UKESM1-0-LL           | 0          | 12         | 13         |
| <b>Total</b>          | <b>231</b> | <b>314</b> | <b>299</b> |

2 **Table S1** Summary of CMIP6 simulations considered in this study. For each model, the number of  
3 available ensemble members is reported for the SSP2-4.5, SSP3-7.0, and SSP5-8.5 scenarios. Totals  
4 across models are provided in the last row.

5

6

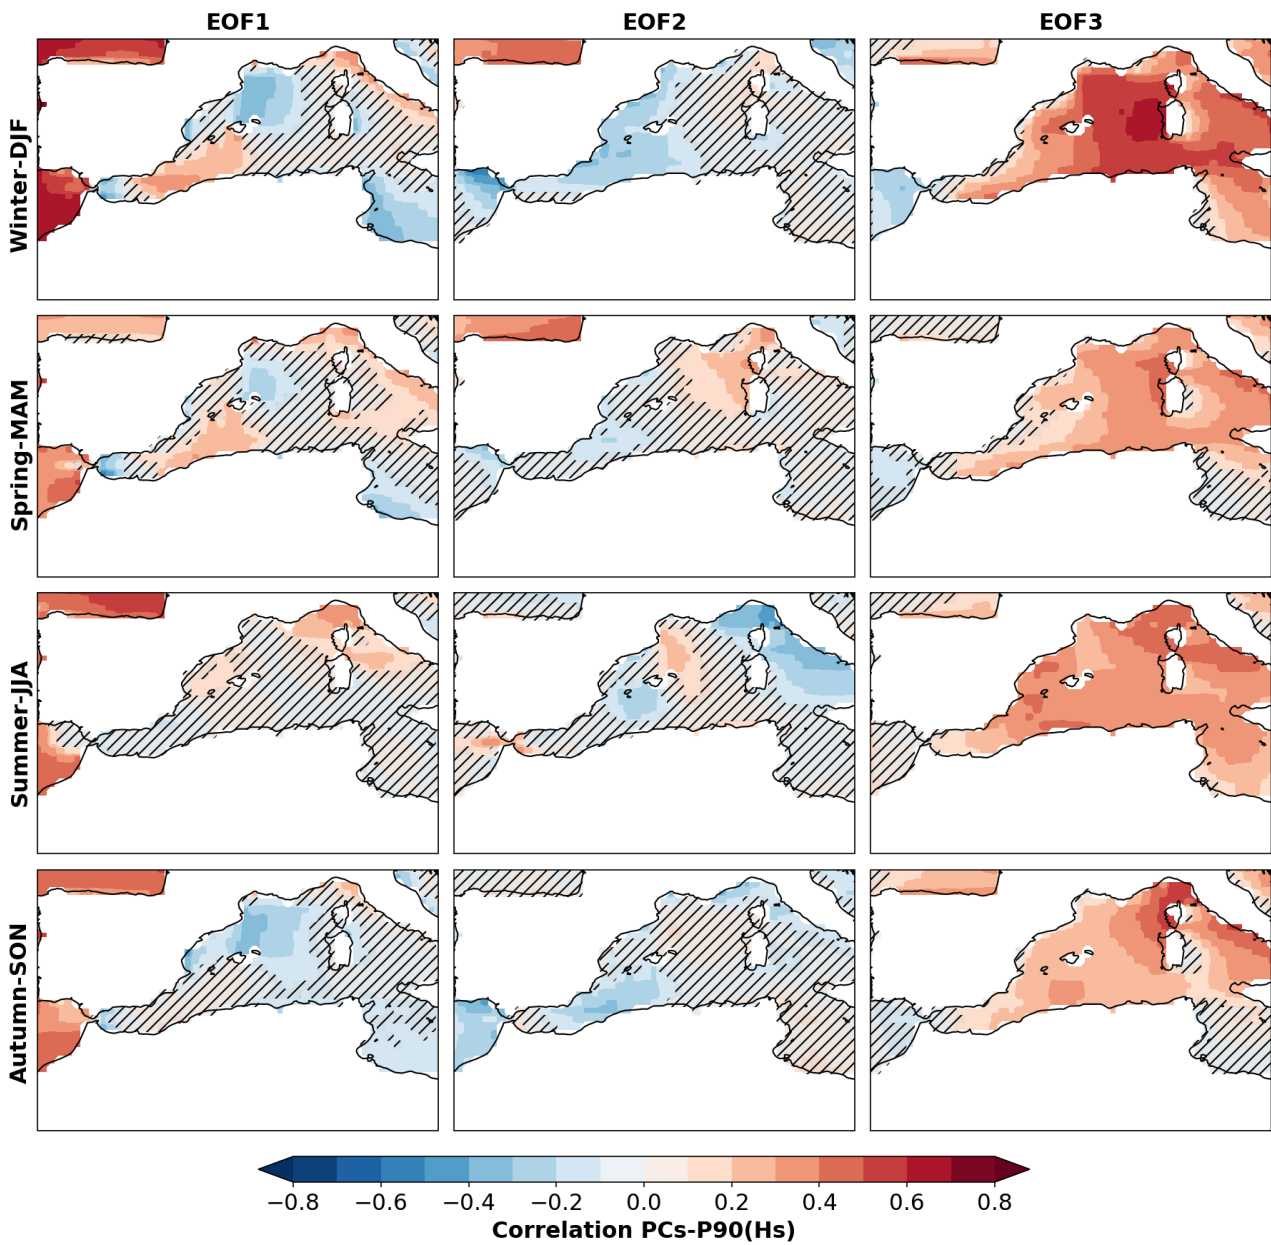

7

8 **Figure S1.** Spatial correlation between the first three principal components (PC1-PC3) of sea-level  
 9 pressure EOFs and extreme significant wave height (Hs), defined using the daily 90<sup>th</sup> percentile, for  
 10 each season. Black-hatched areas indicate regions where correlations are not statistically significant  
 11 ( $p \geq 0.05$ ). The green marker highlights the location of maximum correlation for PC3 in winter (DJF),  
 12 located near Corsica. The color scale reflects both the magnitude and sign of the correlation.

13

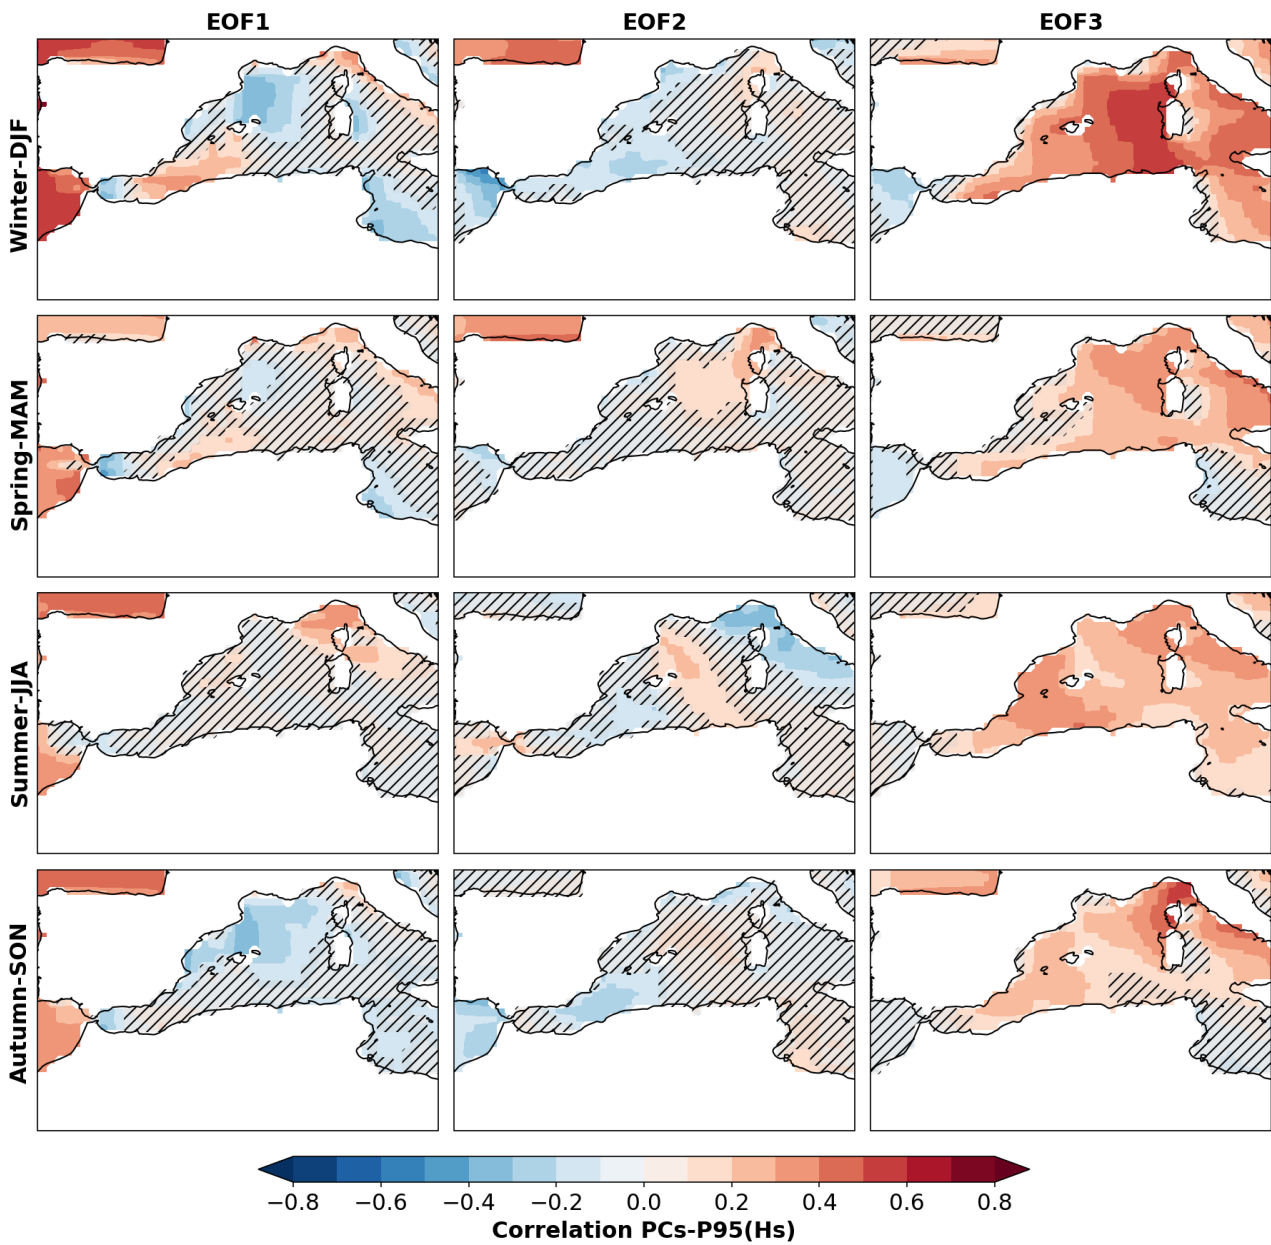

14

15 **Figure S2.** Spatial correlation between the first three principal components (PC1-PC3) of sea-level  
 16 pressure EOFs and extreme significant wave height (Hs), defined using the daily 95<sup>th</sup> percentile, for  
 17 each season. Black-hatched areas indicate regions where correlations are not statistically significant  
 18 ( $p \geq 0.05$ ). The green marker highlights the location of maximum correlation for PC3 in winter (DJF),  
 19 located near Corsica. The color scale reflects both the magnitude and sign of the correlation.

20

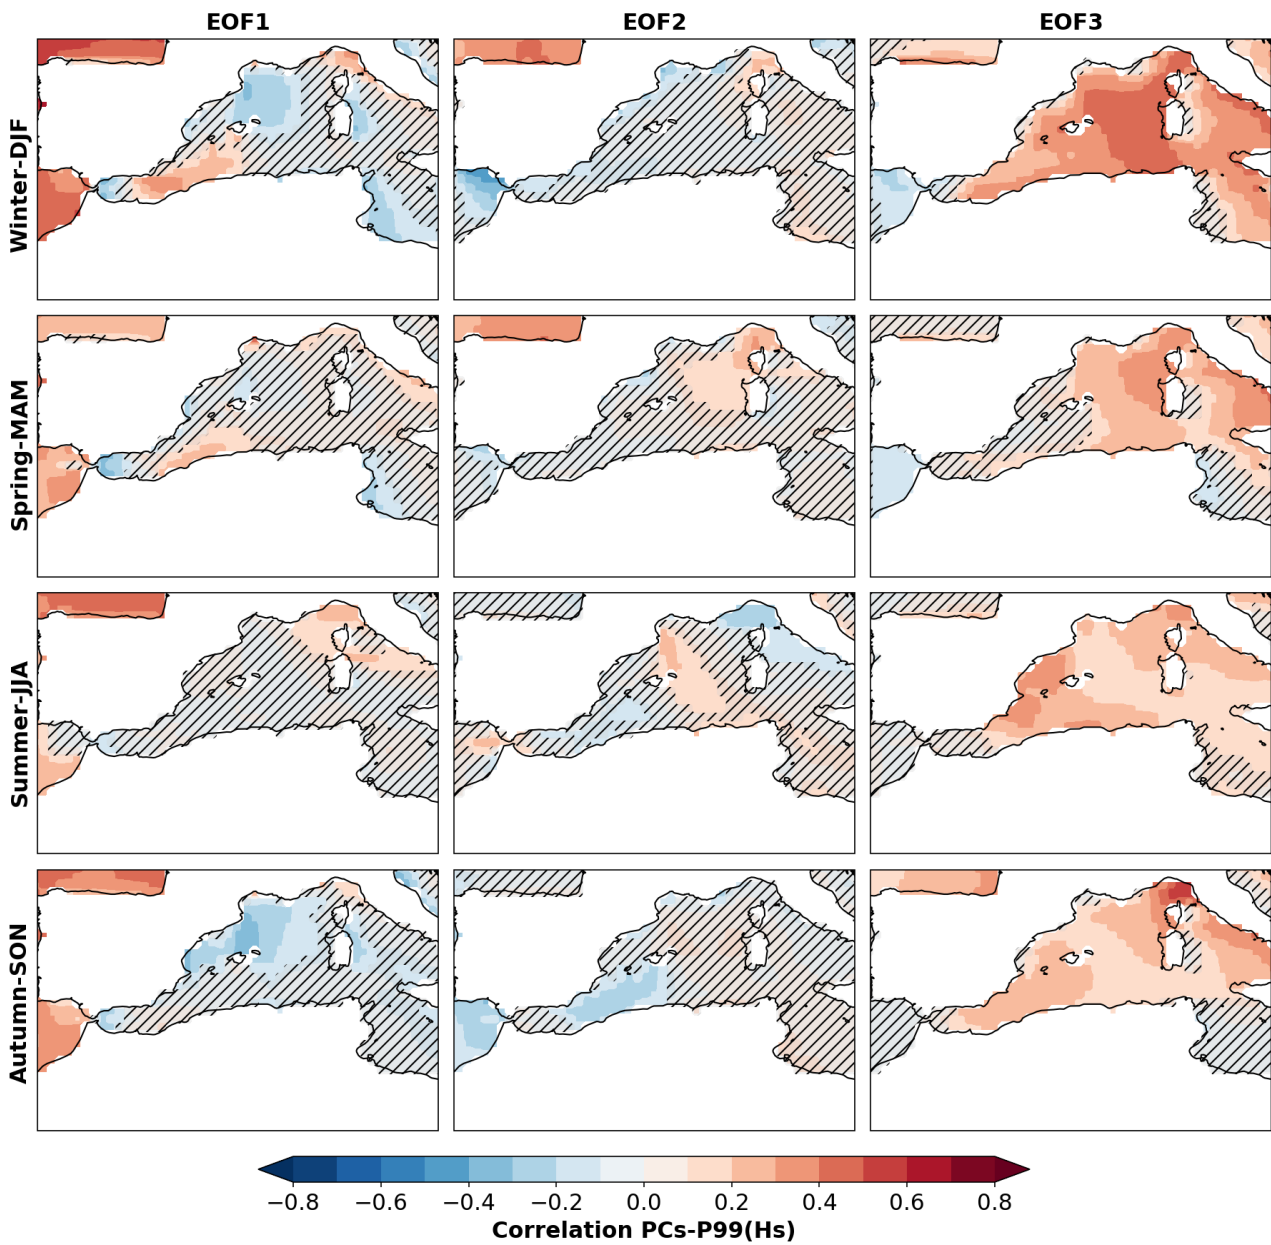

21

22 **Figure S3.** Spatial correlation between the first three principal components (PC1-PC3) of sea-level  
 23 pressure EOFs and extreme significant wave height (Hs), defined using the daily 99th percentile, for  
 24 each season. Black-hatched areas indicate regions where correlations are not statistically significant  
 25 ( $p \geq 0.05$ ). The green marker highlights the location of maximum correlation for PC3 in winter (DJF),  
 26 located near Corsica. The color scale reflects both the magnitude and sign of the correlation.

27

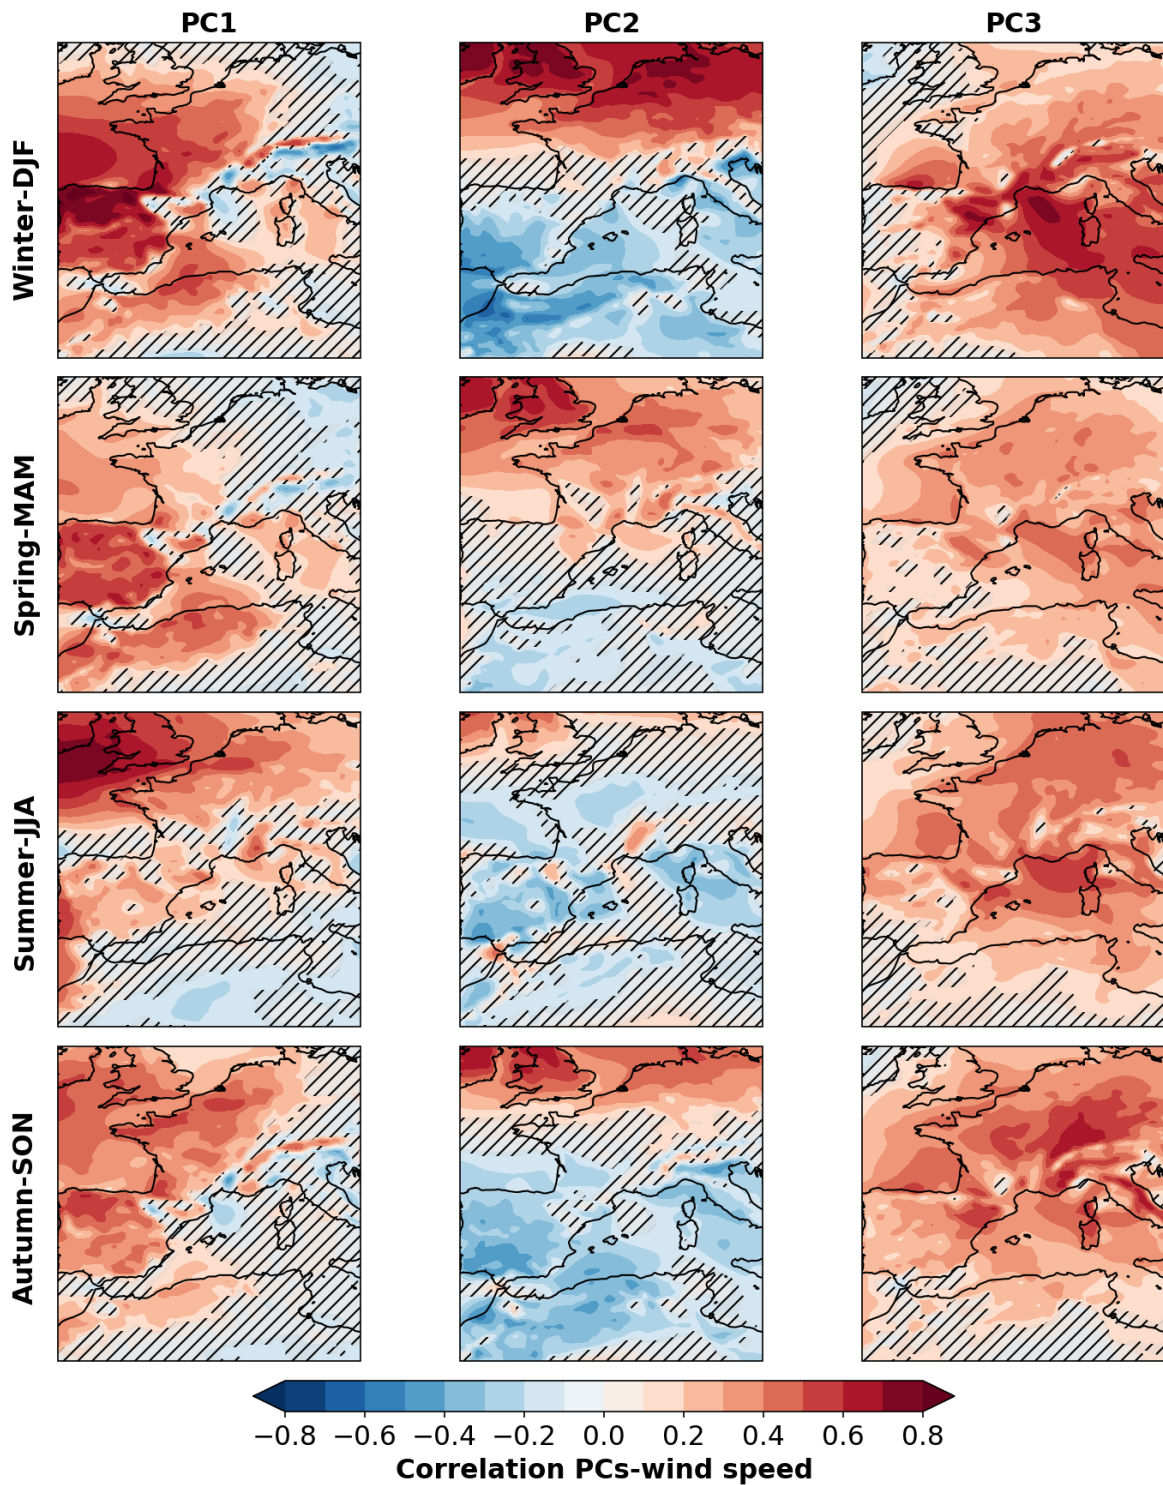

28

29 **Figure S4** Spatial correlation between the first three principal components (PC1, PC2, PC3) of SLP  
 30 EOFs and 10 m wind speed for each season. Grey-hatched regions denote non-significant correlations  
 31 ( $p \geq 0.05$ ). The green marker indicates the location of maximum local correlation for PC3 in winter.  
 32 The color scale represents correlation strength and sign.

33

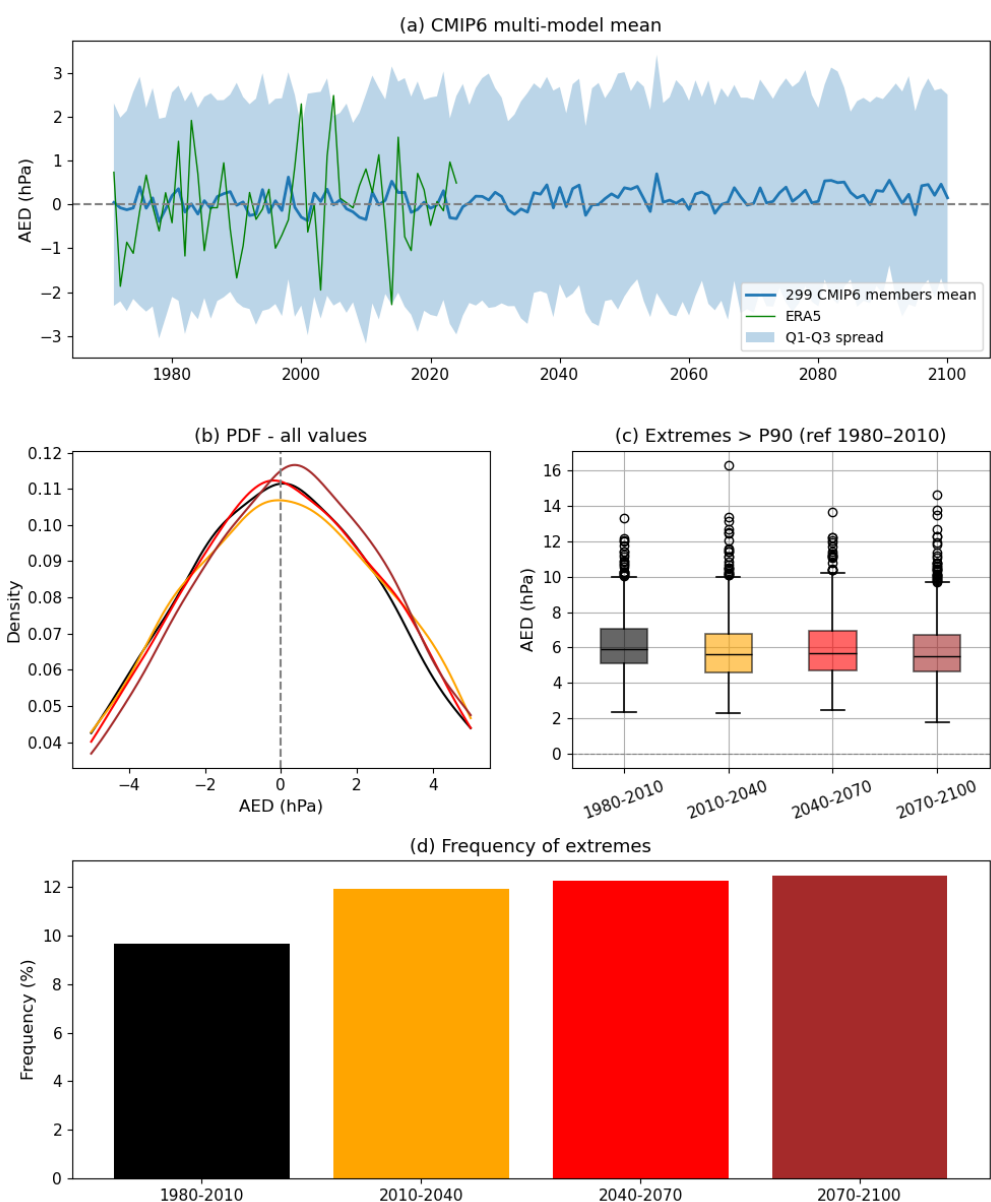

34

35 **Figure S5** Projected changes in the AED in CMIP6 simulations under the SSP2-4.5 scenario. (a)  
 36 Multi-model mean evolution of the AED index computed from sea-level pressure differences between  
 37 the northeastern Atlantic and central Europe. The blue line represents the ensemble mean across 231  
 38 CMIP6 members, while the shaded envelope indicates the interquartile spread among models. The  
 39 index is expressed relative to the 1970-2010 baseline. (b) Probability density functions (PDFs) of  
 40 AED values for four time periods (1980-2010, 2010-2040, 2040-2070, and 2070-2100), illustrating  
 41 changes in the distribution of the circulation index. (c) Distribution of extreme AED events exceeding  
 42 the 90th percentile threshold defined from the 1980-2010 reference period. Boxplots show the  
 43 median, interquartile range, and outliers across all model members. (d) Frequency of extreme AED  
 44 events relative to the reference period. Results indicate a progressive increase in the occurrence of  
 45 strong positive dipole phases during the twenty-first century.

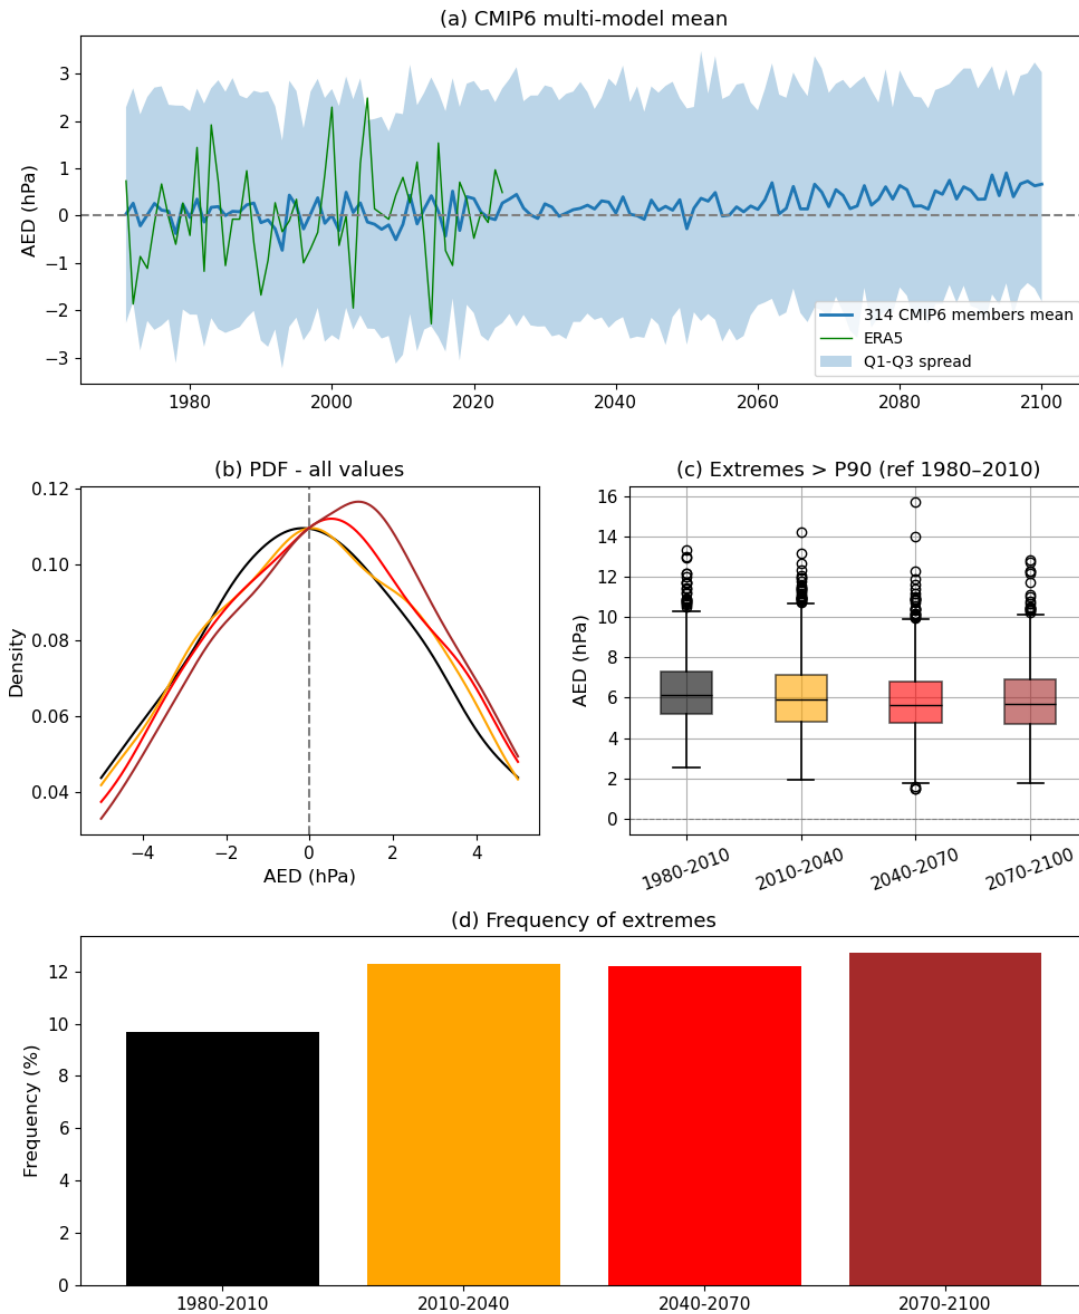

46

47 **Figure S6** Projected changes in the AED in CMIP6 simulations under the SSP3-7.0 scenario. (a)  
 48 Multi-model mean evolution of the AED index computed from sea-level pressure differences between  
 49 the northeastern Atlantic and central Europe. The blue line represents the ensemble mean across 231  
 50 CMIP6 members, while the shaded envelope indicates the interquartile spread among models. The  
 51 index is expressed relative to the 1970-2010 baseline. (b) Probability density functions (PDFs) of  
 52 AED values for four time periods (1980-2010, 2010-2040, 2040-2070, and 2070-2100), illustrating  
 53 changes in the distribution of the circulation index. (c) Distribution of extreme AED events exceeding  
 54 the 90th percentile threshold defined from the 1980-2010 reference period. Boxplots show the  
 55 median, interquartile range, and outliers across all model members. (d) Frequency of extreme AED  
 56 events relative to the reference period. Results indicate a progressive increase in the occurrence of  
 57 strong positive dipole phases during the twenty-first century.

58
